# Supplementary material
Source: Springer Nature journal article supplement (https://www.springermedizin.de/resource/supplementary/12936_2011_1810_MOESM3_ESM.pdf/9541780)

| KEY                                                                         | Users   | Non-Users | Community-wide mean |
|-----------------------------------------------------------------------------|---------|-----------|---------------------|
| No toxicity ( $\theta_{\mu}=0$ ):                                           | -----   | .....     | —————               |
| Partial, pre-feed toxicity ( $\theta_{\mu,pre}=0.5, \theta_{\mu,post}=0$ ): | — — — — | - - - - - | —————               |

*Anopheles arabiensis* with  
alternative hosts

*Anopheles gambiae* with  
No alternative hosts

Fixed emergence rate

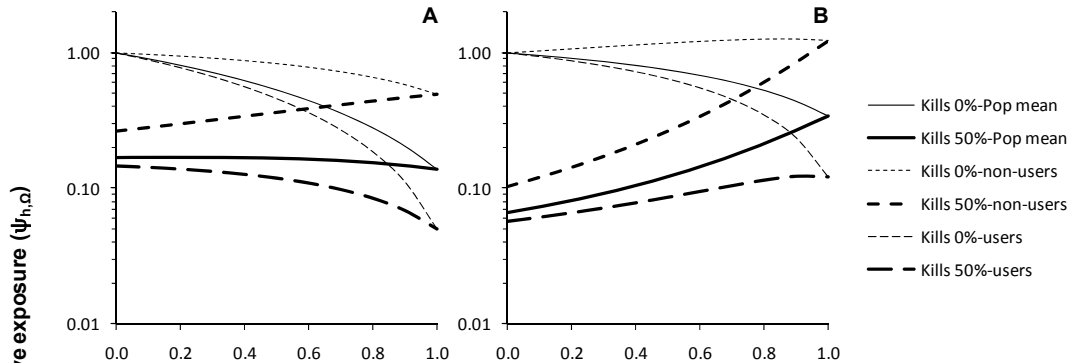

Lifetime fecundity-dependent emergence rate

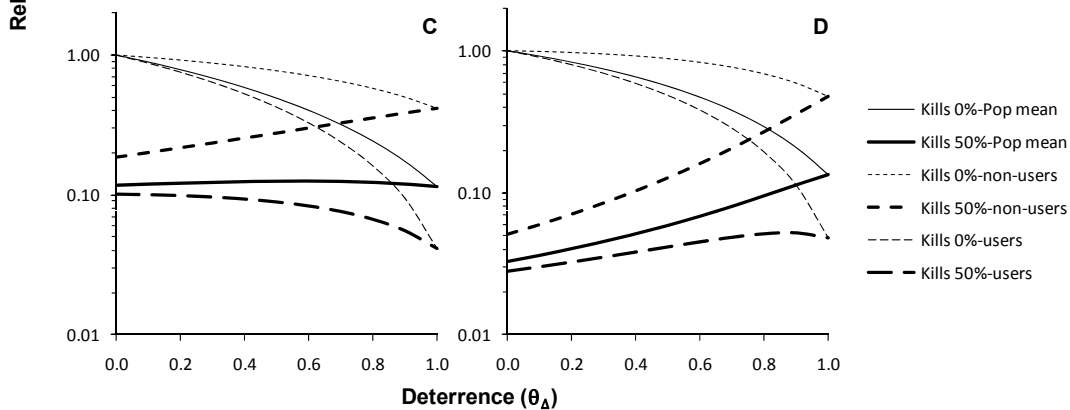

Supplement: MOESM3 [file 9541780]
